# Supplementary material for: The pomegranate-derived peptide Pug-4 alleviates nontypeable Haemophilus influenzae-induced inflammation by suppressing NF-kB signaling and NLRP3 inflammasome activation
Source: PeerJ journal article supplement (doi:10.7717/peerj.16938), 2024-02-20
Supplement: WesternBlots.pdf [file WesternBlots.pdf]

# Original Western Blot Images

## **A pomegranate-derived peptide Pug-4 alleviates nontypeable *Haemophilus influenzae*-induced inflammation by suppressing NF- $\kappa$ B and NLRP3 inflammasome pathways**

Pornpimon Jantaruk<sup>1</sup>, Sittiruk Roytrakul<sup>2</sup>, Anchalee Sistyayanarain<sup>1</sup> and Duangkamol Kunthalert<sup>1, 3\*</sup>

<sup>1</sup> Department of Microbiology and Parasitology, Faculty of Medical Science, Naresuan University, Phitsanulok, Thailand

<sup>2</sup> National Center for Genetic Engineering and Biotechnology, National Science and Technology Development Agency, Thailand Science Park, Pathumthani, Thailand

<sup>3</sup> Centre of Excellence in Medical Biotechnology, Faculty of Medical Science, Naresuan University, Phitsanulok, Thailand

\*Corresponding author:

Duangkamol Kunthalert

Email address: [duangkamol@nu.ac.th](mailto:duangkamol@nu.ac.th), [kunthalertd@yahoo.com](mailto:kunthalertd@yahoo.com)

**Figure 5 Pug-4 peptide inhibited iNOS and COX-2 protein expression in NTHi-infected A549 cells.**

**Total proteins extraction**

| iNOS         | A: Exposure time 1/100 sec |   |   |    |    | B: Exposure time 1200 sec |                      |   |   |    |    |     |
|--------------|----------------------------|---|---|----|----|---------------------------|----------------------|---|---|----|----|-----|
| <b>Exp.1</b> | <b>Pug-4 (μM)</b>          | - | - | 25 | 50 | 100                       | <b>Pug-4 (μM)</b>    | - | - | 25 | 50 | 100 |
|              | <b>NTHi (MOI=10)</b>       | - | + | +  | +  | +                         | <b>NTHi (MOI=10)</b> | - | + | +  | +  | +   |
|              |                            |   |   |    |    |                           |                      |   |   |    |    |     |
| <b>Exp.2</b> |                            |   |   |    |    |                           |                      |   |   |    |    |     |

| COX-2   | A: Exposure time 1/100 sec |   |   |    |    | B: Exposure time 240 sec |                      |   |   |    |    |     |  |
|---------|----------------------------|---|---|----|----|--------------------------|----------------------|---|---|----|----|-----|--|
| Exp.1-1 | <b>Pug-4 (μM)</b>          | - | - | 25 | 50 | 100                      | <b>Pug-4 (μM)</b>    | - | - | 25 | 50 | 100 |  |
|         | <b>NTHi (MOI=10)</b>       | - | + | +  | +  | +                        | <b>NTHi (MOI=10)</b> | - | + | +  | +  | +   |  |
|         |                            |   |   |    |    |                          |                      |   |   |    |    |     |  |
| Exp.2-1 |                            |   |   |    |    |                          |                      |   |   |    |    |     |  |
| Exp.1-2 |                            |   |   |    |    |                          |                      |   |   |    |    |     |  |
| Exp.2-2 |                            |   |   |    |    |                          |                      |   |   |    |    |     |  |

| $\beta$ -actin | A: Exposure time 1/100 sec       |   |   |    |    |     | B: Exposure time 3 sec           |      |   |    |    |     |  |                |
|----------------|----------------------------------|---|---|----|----|-----|----------------------------------|------|---|----|----|-----|--|----------------|
| <b>Exp.1</b>   | <b>Pug-4 (<math>\mu</math>M)</b> | - | - | 25 | 50 | 100 | <b>Pug-4 (<math>\mu</math>M)</b> | -    | - | 25 | 50 | 100 |  |                |
|                | <b>NTHi (MOI=10)</b>             | - | + | +  | +  | +   | <b>NTHi (MOI=10)</b>             | -    | + | +  | +  | +   |  |                |
|                | 63 —                             |   |   |    |    |     |                                  | 63 — |   |    |    |     |  | $\beta$ -actin |
|                | 48 —                             |   |   |    |    |     |                                  | 48 — |   |    |    |     |  |                |
|                | 35 —                             |   |   |    |    |     |                                  | 35 — |   |    |    |     |  |                |
|                | 25 —                             |   |   |    |    |     |                                  | 25 — |   |    |    |     |  |                |
|                | 20 —                             |   |   |    |    |     |                                  | 20 — |   |    |    |     |  |                |
|                | 17 —                             |   |   |    |    |     |                                  | 17 — |   |    |    |     |  |                |
| <b>Exp.2</b>   | 63 —                             |   |   |    |    |     |                                  | 63 — |   |    |    |     |  | $\beta$ -actin |
|                | 48 —                             |   |   |    |    |     |                                  | 48 — |   |    |    |     |  |                |
|                | 35 —                             |   |   |    |    |     |                                  | 35 — |   |    |    |     |  |                |
|                | 25 —                             |   |   |    |    |     |                                  | 25 — |   |    |    |     |  |                |
|                | 20 —                             |   |   |    |    |     |                                  | 20 — |   |    |    |     |  |                |
|                | 17 —                             |   |   |    |    |     |                                  | 17 — |   |    |    |     |  |                |
|                | 11 —                             |   |   |    |    |     |                                  | 11 — |   |    |    |     |  |                |

**Figure 6 Pug-4 peptide inhibits NTHi-induced NF-κB activation in A549 cells.**

**Proteins from Nuclear extraction**

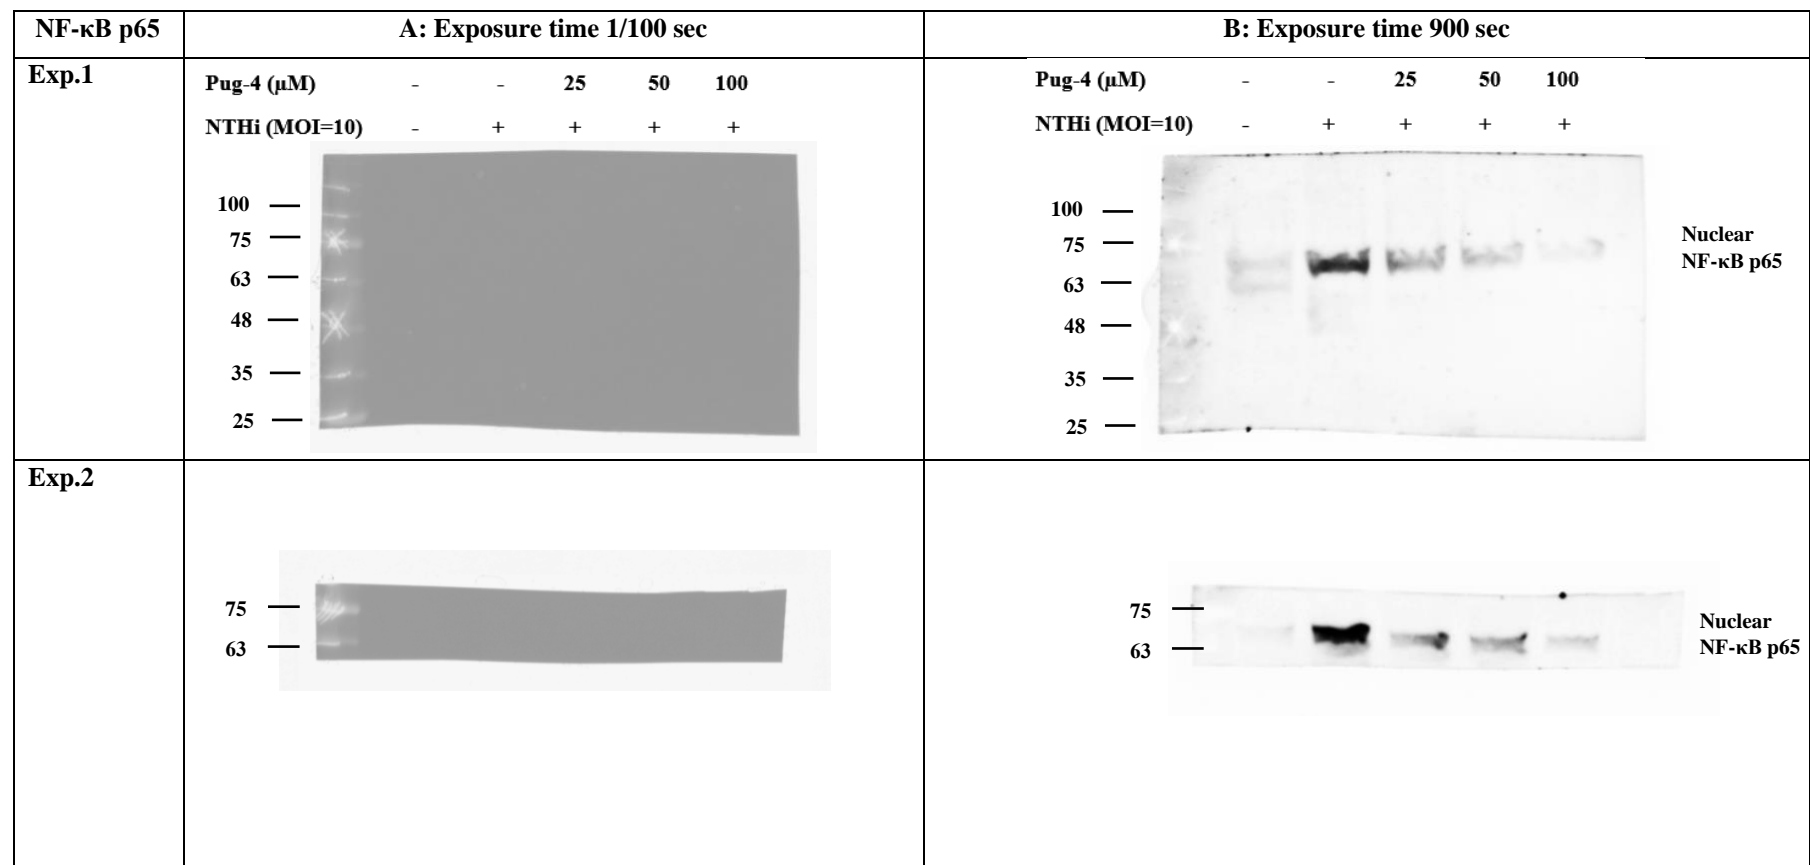

**Proteins from Cytoplasmic extraction**

| NF-κB p65           | A: Exposure time 1/100 sec                                                                                                                                                                                                                                                                        | B: Exposure time 240 sec                                                                                             |    |    |     |    |     |               |   |   |   |   |   |                                                                                                                                                                                                                                                                                                                                     |            |   |   |    |    |     |               |   |   |   |   |   |
|---------------------|---------------------------------------------------------------------------------------------------------------------------------------------------------------------------------------------------------------------------------------------------------------------------------------------------|----------------------------------------------------------------------------------------------------------------------|----|----|-----|----|-----|---------------|---|---|---|---|---|-------------------------------------------------------------------------------------------------------------------------------------------------------------------------------------------------------------------------------------------------------------------------------------------------------------------------------------|------------|---|---|----|----|-----|---------------|---|---|---|---|---|
| <p><b>Exp.1</b></p> | <table border="1"> <tr> <td>Pug-4 (μM)</td> <td>-</td> <td>-</td> <td>25</td> <td>50</td> <td>100</td> </tr> <tr> <td>NTHi (MOI=10)</td> <td>-</td> <td>+</td> <td>+</td> <td>+</td> <td>+</td> </tr> </table>  | Pug-4 (μM)                                                                                                           | -  | -  | 25  | 50 | 100 | NTHi (MOI=10) | - | + | + | + | + | <table border="1"> <tr> <td>Pug-4 (μM)</td> <td>-</td> <td>-</td> <td>25</td> <td>50</td> <td>100</td> </tr> <tr> <td>NTHi (MOI=10)</td> <td>-</td> <td>+</td> <td>+</td> <td>+</td> <td>+</td> </tr> </table>  <p>Cytoplasmic<br/>NF-κB p65</p> | Pug-4 (μM) | - | - | 25 | 50 | 100 | NTHi (MOI=10) | - | + | + | + | + |
| Pug-4 (μM)          | -                                                                                                                                                                                                                                                                                                 | -                                                                                                                    | 25 | 50 | 100 |    |     |               |   |   |   |   |   |                                                                                                                                                                                                                                                                                                                                     |            |   |   |    |    |     |               |   |   |   |   |   |
| NTHi (MOI=10)       | -                                                                                                                                                                                                                                                                                                 | +                                                                                                                    | +  | +  | +   |    |     |               |   |   |   |   |   |                                                                                                                                                                                                                                                                                                                                     |            |   |   |    |    |     |               |   |   |   |   |   |
| Pug-4 (μM)          | -                                                                                                                                                                                                                                                                                                 | -                                                                                                                    | 25 | 50 | 100 |    |     |               |   |   |   |   |   |                                                                                                                                                                                                                                                                                                                                     |            |   |   |    |    |     |               |   |   |   |   |   |
| NTHi (MOI=10)       | -                                                                                                                                                                                                                                                                                                 | +                                                                                                                    | +  | +  | +   |    |     |               |   |   |   |   |   |                                                                                                                                                                                                                                                                                                                                     |            |   |   |    |    |     |               |   |   |   |   |   |
| <p><b>Exp.2</b></p> |                                                                                                                                                                                                                 |  <p>Cytoplasmic<br/>NF-κB p65</p> |    |    |     |    |     |               |   |   |   |   |   |                                                                                                                                                                                                                                                                                                                                     |            |   |   |    |    |     |               |   |   |   |   |   |

| <b>β-actin</b> | <b>A: Exposure time 1/100 sec</b> |   |   |    |    | <b>B: Exposure time 3 sec</b> |                      |   |   |    |                |     |  |
|----------------|-----------------------------------|---|---|----|----|-------------------------------|----------------------|---|---|----|----------------|-----|--|
| <b>Exp.1</b>   | <b>Pug-4 (μM)</b>                 | - | - | 25 | 50 | 100                           | <b>Pug-4 (μM)</b>    | - | - | 25 | 50             | 100 |  |
|                | <b>NTHi (MOI=10)</b>              | - | + | +  | +  | +                             | <b>NTHi (MOI=10)</b> | - | + | +  | +              | +   |  |
|                |                                   |   |   |    |    |                               |                      |   |   |    | <b>β-actin</b> |     |  |
| <b>Exp.2</b>   |                                   |   |   |    |    |                               |                      |   |   |    | <b>β-actin</b> |     |  |

**Figure 7 Pug-4 peptide suppressed NTHi-induced activation of NLRP3 inflammasome pathway in A549 cells.**

**Proteins from supernatant**

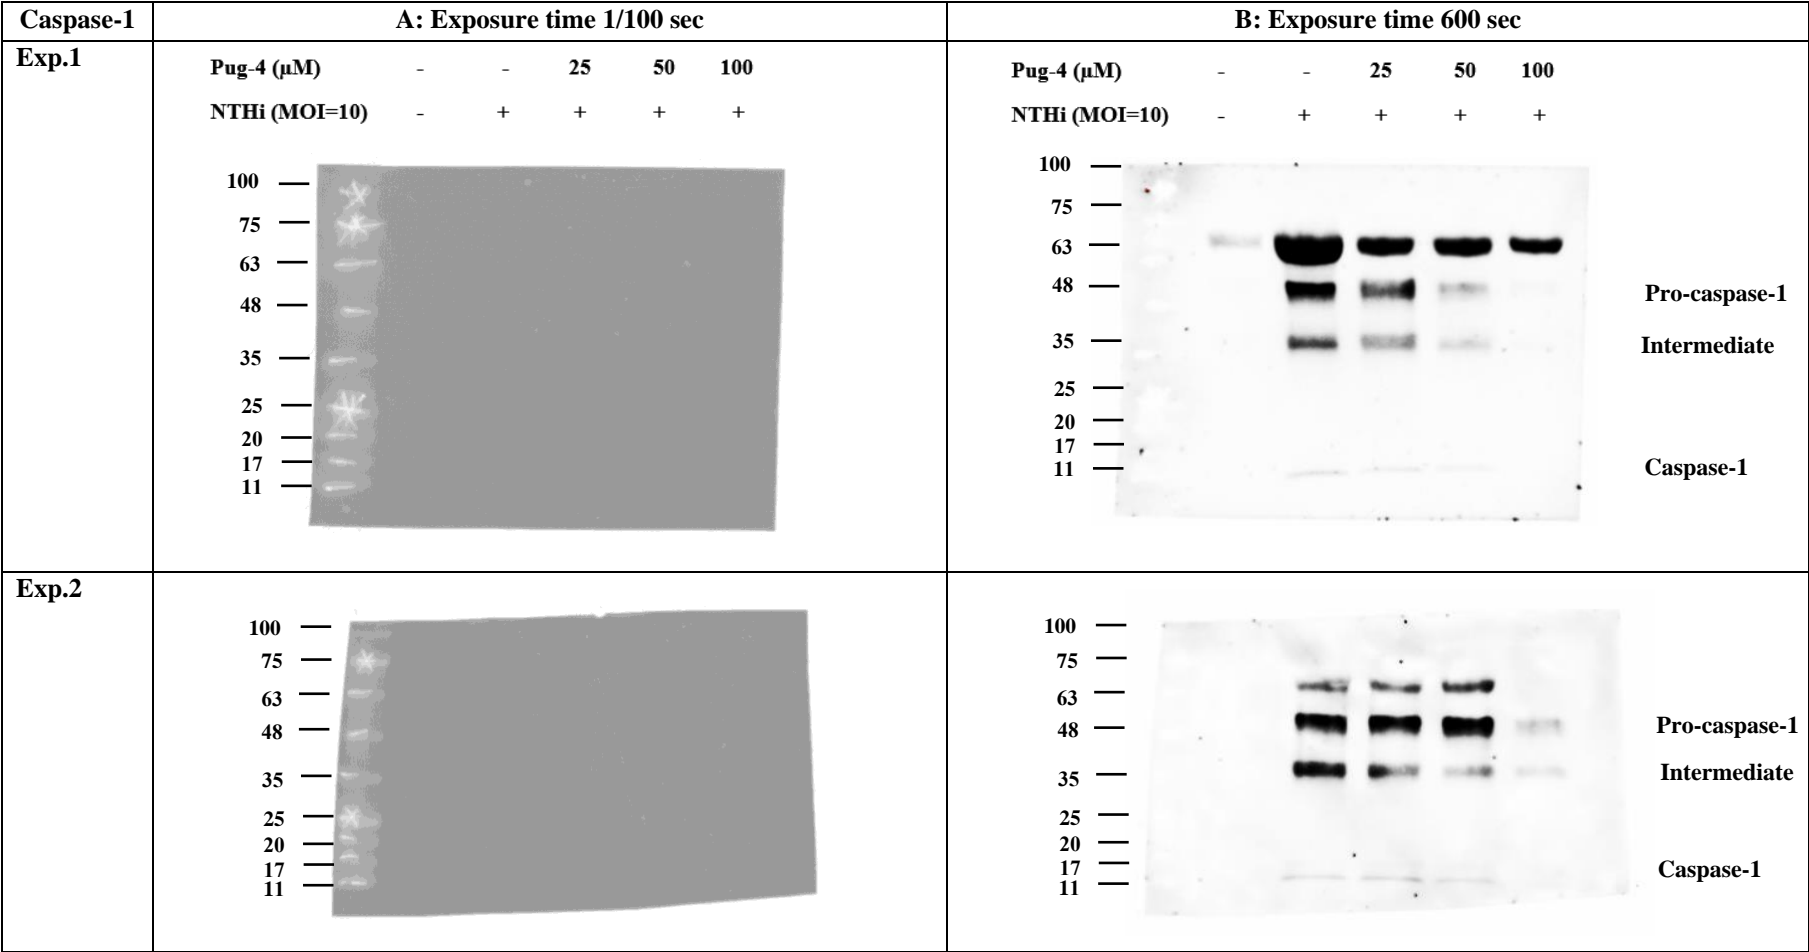



| IL-1 $\beta$ | A: Exposure time 1/100 sec                                                                                                                                                                                                                                             | B: Exposure time 600 sec                                                                                                                                                                                                                                                                                                                                                                                 |
|--------------|------------------------------------------------------------------------------------------------------------------------------------------------------------------------------------------------------------------------------------------------------------------------|----------------------------------------------------------------------------------------------------------------------------------------------------------------------------------------------------------------------------------------------------------------------------------------------------------------------------------------------------------------------------------------------------------|
| Exp.1        | <p data-bbox="387 256 936 284">Pug-4 (<math>\mu</math>M)      -      -      25      50      100</p> <p data-bbox="387 300 936 327">NTHi (MOI=10)   -      +      +      +      +</p> 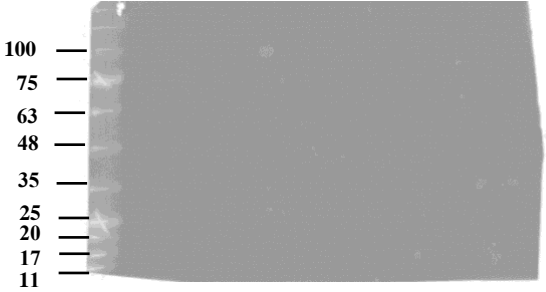 | <p data-bbox="1182 256 1731 284">Pug-4 (<math>\mu</math>M)      -      -      25      50      100</p> <p data-bbox="1182 300 1731 327">NTHi (MOI=10)   -      +      +      +      +</p>  <p data-bbox="1816 496 1928 523">Pro-IL-1<math>\beta</math></p> <p data-bbox="1816 560 1883 587">IL-1<math>\beta</math></p> |
| Exp.2        |                                                                                                                                                                                      |  <p data-bbox="1794 895 1906 922">Pro-IL-1<math>\beta</math></p> <p data-bbox="1794 959 1861 986">IL-1<math>\beta</math></p>                                                                                                                                                                                         |

**Proteins from cell lysates**

| NLRP3 | A: Exposure time 1/100 sec       |                                                                                    |   |    |    | B: Exposure time 240 sec |                                  |                                                                                     |   |    |    |     |              |
|-------|----------------------------------|------------------------------------------------------------------------------------|---|----|----|--------------------------|----------------------------------|-------------------------------------------------------------------------------------|---|----|----|-----|--------------|
| Exp.1 | Pug-4 (μM)                       | -                                                                                  | - | 25 | 50 | 100                      | Pug-4 (μM)                       | -                                                                                   | - | 25 | 50 | 100 |              |
|       | NTHi (MOI=10)                    | -                                                                                  | + | +  | +  | +                        | NTHi (MOI=10)                    | -                                                                                   | + | +  | +  | +   |              |
|       | 245 —<br>180 —<br>135 —<br>100 — |  |   |    |    |                          | 245 —<br>180 —<br>135 —<br>100 — |  |   |    |    |     | <b>NLRP3</b> |
| Exp.2 | 245 —<br>180 —<br>135 —<br>100 — |  |   |    |    |                          | 245 —<br>180 —<br>135 —<br>100 — |  |   |    |    |     | <b>NLRP3</b> |

| $\beta$ -actin | A: Exposure time 1/100 sec       |      |   |    |    |     | B: Exposure time 3 sec           |   |   |    |    |     |                |
|----------------|----------------------------------|------|---|----|----|-----|----------------------------------|---|---|----|----|-----|----------------|
| Exp.1          | <b>Pug-4 (<math>\mu</math>M)</b> | -    | - | 25 | 50 | 100 | <b>Pug-4 (<math>\mu</math>M)</b> | - | - | 25 | 50 | 100 | $\beta$ -actin |
|                | <b>NTHi (MOI=10)</b>             | -    | + | +  | +  | +   | <b>NTHi (MOI=10)</b>             | - | + | +  | +  | +   |                |
|                |                                  | 63 — |   |    |    |     | 63 —                             |   |   |    |    |     |                |
|                |                                  | 48 — |   |    |    |     | 48 —                             |   |   |    |    |     |                |
|                |                                  | 35 — |   |    |    |     | 35 —                             |   |   |    |    |     |                |
|                |                                  | 25 — |   |    |    |     | 25 —                             |   |   |    |    |     |                |
|                |                                  | 20 — |   |    |    |     | 20 —                             |   |   |    |    |     |                |
|                |                                  | 17 — |   |    |    |     | 17 —                             |   |   |    |    |     |                |
| Exp.2          |                                  | 63 — |   |    |    |     | 63 —                             |   |   |    |    |     | $\beta$ -actin |
|                |                                  | 48 — |   |    |    |     | 48 —                             |   |   |    |    |     |                |
|                |                                  | 35 — |   |    |    |     | 35 —                             |   |   |    |    |     |                |
|                |                                  | 25 — |   |    |    |     | 25 —                             |   |   |    |    |     |                |
|                |                                  | 20 — |   |    |    |     | 20 —                             |   |   |    |    |     |                |
|                |                                  | 17 — |   |    |    |     | 17 —                             |   |   |    |    |     |                |
|                |                                  | 11 — |   |    |    |     | 11 —                             |   |   |    |    |     |                |
